# Supplementary material for: Alpha-Mangostin: A Potent Inhibitor of TRPV3 and Pro-Inflammatory Cytokine Secretion in Keratinocytes
Source: MDPI journal article supplement (doi:10.3390/ijms241612930), 2023-08-18
Supplement: s1 [file s1]

## Supplementary

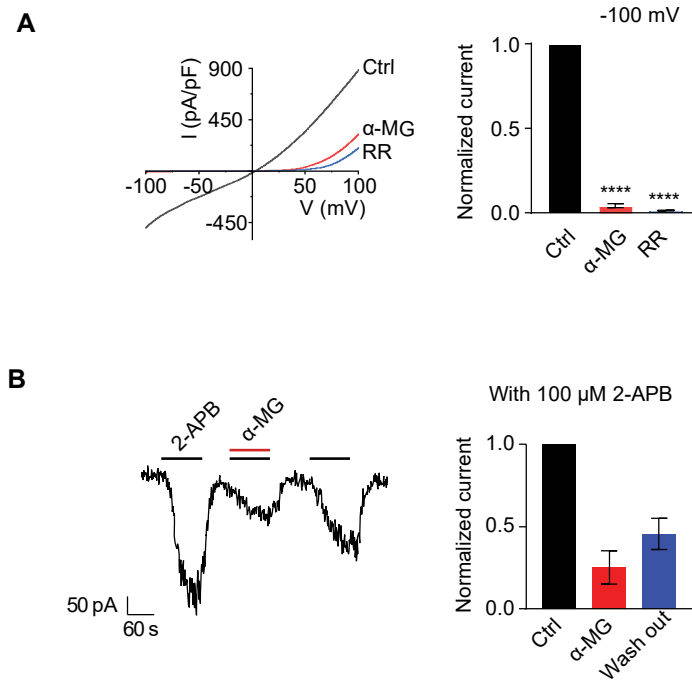

**Figure S1.** (A) Alpha-mangostin almost completely inhibited 2-APB-evoked TRPV3 current at 10  $\mu$ M. The left panel shows the current-voltage relationship and the right panel shows the summary of the normalized current at -100 mV. Currents were elicited with ramp pulses from -100 to +100 mV over 1 s, which was repetitively applied every 20 s, and the holding potential was set at 0 mV. The channel was activated using 100  $\mu$ M 2-APB and subsequently perfused with solutions containing 10  $\mu$ M alpha-mangostin with 100  $\mu$ M 2-APB. A solution containing 10  $\mu$ M ruthenium red (RR, a TRP channel inhibitor) and 100  $\mu$ M 2-APB was perfused at the end. Currents were normalized to the maximum response to 2-APB at -100 mV. (B) The inhibitory effect of alpha-mangostin on TRPV3 current was partly reversible. The left panel shows the representative traces recorded at -60 mV holding potential, and the right panel shows the summary of normalized current at -60 mV. Currents were normalized to the maximum response to 2-APB at -60 mV. Data are presented as means  $\pm$  SEM.
